# Supplementary material for: Intestinal Nogo-B reduces GLP1 levels by binding to proglucagon on the endoplasmic reticulum to inhibit PCSK1 cleavage
Source: PubMed Central journal article supplement — Nat Commun. 2024 Aug 10;15:6845. doi: 10.1038/s41467-024-51352-3 (PMC11315690; doi:10.1038/s41467-024-51352-3), 2024-08-10

**Intestinal Nogo-B reduces the GLP1 levels by binding to proglucagon on  
the endoplasmic reticulum to inhibit PCSK1 cleavage**

**SUPPLEMENTARY INFORMATION**

**This PDF file includes:**

- **Supplementary Figures S1-S16**
- **Supplementary Tables S1-S6**
- **Uncropped Scans of Blots in Supplementary Figures**

**Supplementary Figures:**

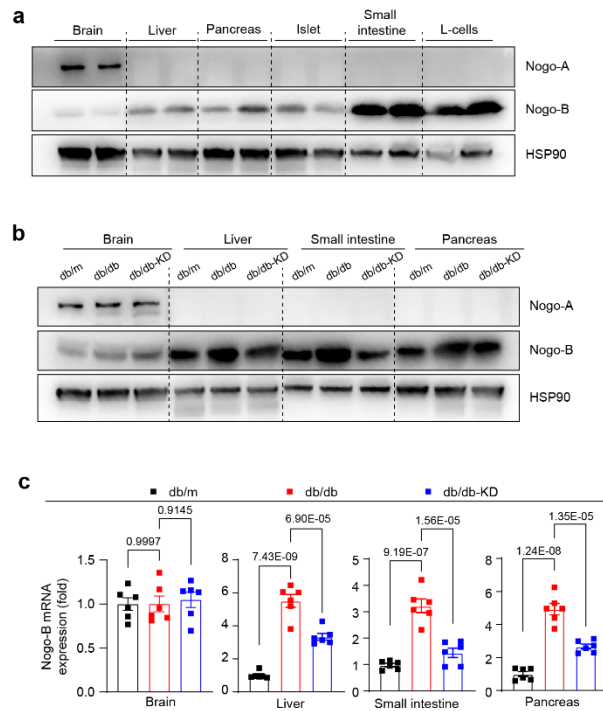

**Supplementary Figure 1. The levels of Nogo-A and Nogo-B in different tissues of C57BL/6J mice and db/db mice. a, Nogo-A and Nogo-B protein levels in different tissues of C57BL/6J mice. b, c, Nogo-A and Nogo-B protein and mRNA levels in different tissues of db/db mice (n = 6 mice per group). Data are expressed as the mean  $\pm$  SEM. The *p* values were calculated by one-way ANOVAs. Source data are provided as a Source Data file.**

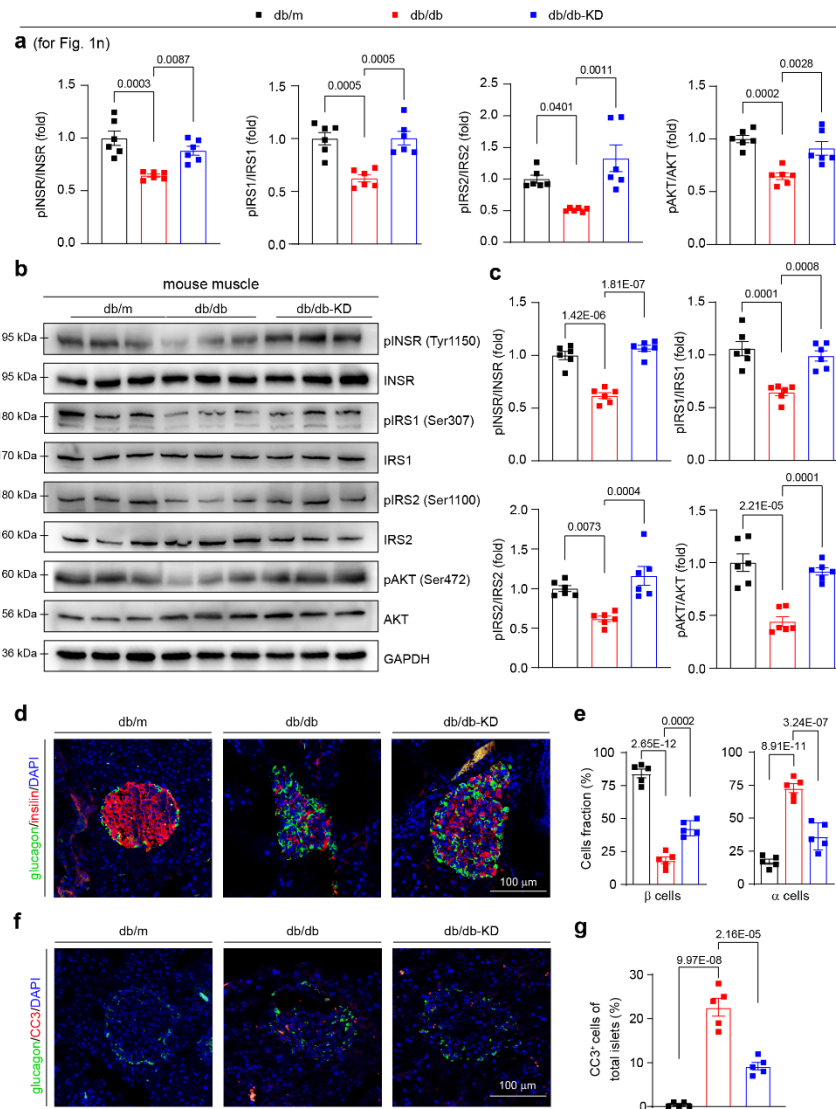

**Supplementary Figure 2. Muscle insulin sensitivity and pancreatic injury of db/db mice.** **a**, Analysis of band density in Fig. 1n (n = 6 mice per group). **b**, **c**, pINSR, INSR, pIRS1, IRS1, pIRS2, IRS2, pAKT and AKT protein levels in mouse muscle and analysis of band density (n = 6 mice per group). **d**, Islet images after siRNA injection (insulin, red; glucagon, green; DAPI, blue). **e**, Analysis of  $\beta$ -cell or  $\alpha$ -cell as the percentage of pancreatic cells after siRNA injection (n = 5 mice per group). **f**, **g**, Islet images after siRNA injection (CC3, cleaved caspase 3, red; glucagon, green; DAPI, blue). Analysis of CC3<sup>+</sup> cells as the percentage of pancreatic cells after siRNA injection (n = 5 mice per group). Data are expressed as the mean  $\pm$  SEM. The *p* values were calculated by one-way ANOVAs. Source data are provided as a Source Data file.

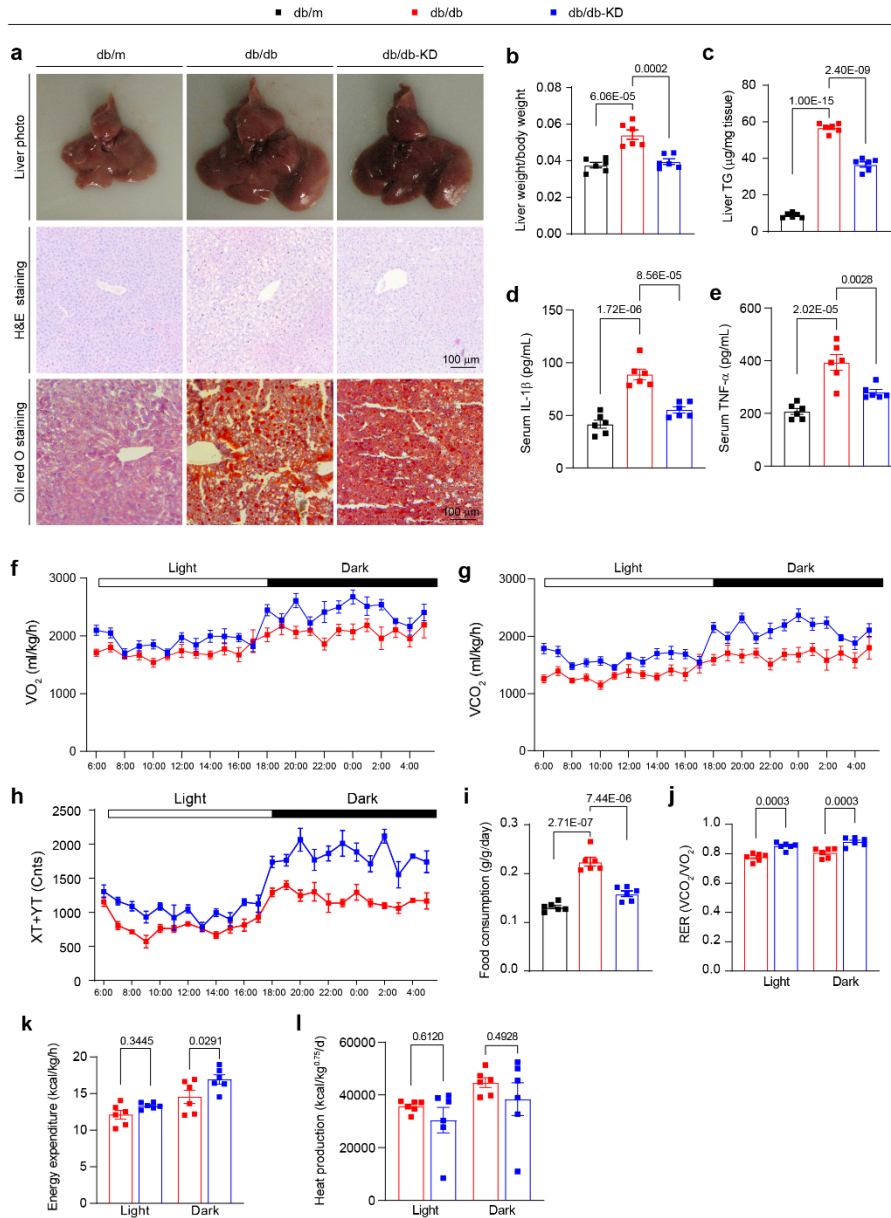

**Supplementary Figure 3. Nogo-B knockdown reduced liver injury and lipid accumulation in db/db mice.** **a**, Representative photographs of the whole liver, H&E and oil red O staining images of the liver sections of mice after siRNA injection. **b**, Liver weight to body weight of mice after siRNA injection (n= 6 mice per group). **c**, Liver TG levels of mice after siRNA injection (n = 6 mice per group). **d**, **e**, Serum IL-1β and TNF-α levels of mice (n = 6 mice per group). **f**, **g**, The curves of O<sub>2</sub> consumption (**f**) and CO<sub>2</sub> production (**g**) of mice after siRNA injection during a 24-h light–dark cycle (n= 6 mice per group). **h**, The locomotor activity of mice after siRNA injection during a 24-h light–dark cycle (n= 6). **i**, Food consumption of mice after siRNA injection (n= 6 mice per group). **j**–**l**, The respiratory exchange rate (RER) (**j**), energy expenditure (**k**), and heat production (**l**) of mice after siRNA injection (n = 6 mice per group). Data are expressed as the mean ± SEM. The p values were calculated by one-way ANOVAs. Source data are provided as a Source Data file.

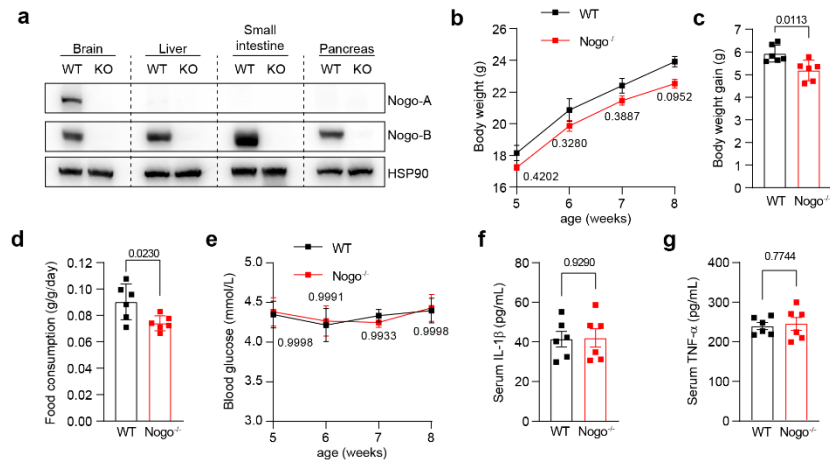

**Supplementary Figure 4. Nogos levels and basal signs of Nogo<sup>-/-</sup> mice.** **a**, Nogo-A and Nogo-B protein levels in different tissues of WT and Nogo<sup>-/-</sup> mice. **b**, Body weight of WT and Nogo<sup>-/-</sup> mice (n = 6 mice per group). **c**, Body weight gain of WT and Nogo<sup>-/-</sup> mice (n = 6 mice per group). **d**, Food consumption of WT and Nogo<sup>-/-</sup> mice (n = 6 mice per group). **e**, Fasted glucose levels of WT and Nogo<sup>-/-</sup> mice (n = 6 mice per group). **f**, **g**, Serum IL-1β and TNF-α levels of WT and Nogo<sup>-/-</sup> mice (n = 6 mice per group). Data are expressed as the mean ± SEM. The *p* values were calculated by two-tailed Student's *t* test. Source data are provided as a Source Data file.

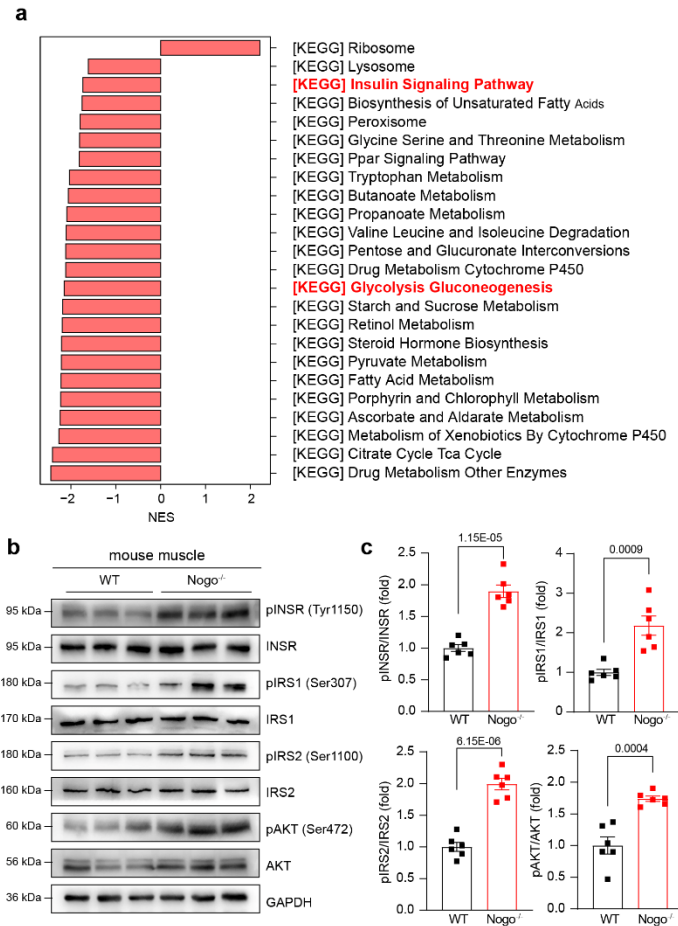

**Supplementary Figure 5. Gene enrichment analysis (GSEA) and muscle insulin sensitivity WT and Nogo<sup>-/-</sup> mice.** **a**, GSEA was performed to analyze the pathways affected by Nogo deficiency in the liver. **b**, **c**, pINSR, INSR, pIRS1, IRS1, pIRS2, IRS2, pAKT and AKT protein levels in mouse muscle and analysis of band density ( $n = 6$  mice per group). Data are expressed as the mean  $\pm$  SEM. The  $p$  values were calculated by two-tailed Student's  $t$  test. Source data are provided as a Source Data file.

**a** species: Homo sapiens

```

:*. * : * ***** ** . : : : : . * * : * : * .
250 EGHPPFRAYLESEVAISEELVQKYSNSALGHVNCITIKELRRLFLVDDLV 294 Nogo-B
125 KGRGRDFPE-EVAIVEELGRRHADGSFSDEMNTI-----LDNLA 163 proGCG

. . . * * : * : * * : * * * : . *
178 RRGSSGSVVVDLLYWRDIKKTGVVFGASLFLLLSLT 213 Nogo-B
37 NQHLCGSHLVEALY-----LVCGERGFYTPKT 54 insulin

```

**b** species: Mus musculus

```

:*. * : * ***** ** . : : : : . * * : * : * .
233 EGHPPFRAYLESEVAISEELVQKYSNSALGHVNSTIKELRRLFLVDDLV 270 Nogo-B
125 KGRGRDFPE-EVAIAEELGRRHADGSFSDEMSTI-----LDNLA 163 proGCG

* . * * * . . * . : * : * * : * * * :
143 PPSTPAAPKRRGSGSVVVDLLYWRDIKKTGVVFGASLFL 188 Nogo-B
19 PKPTQAFVKQHLGPHLVEALY-----LVCGERGF 57 insulin

```

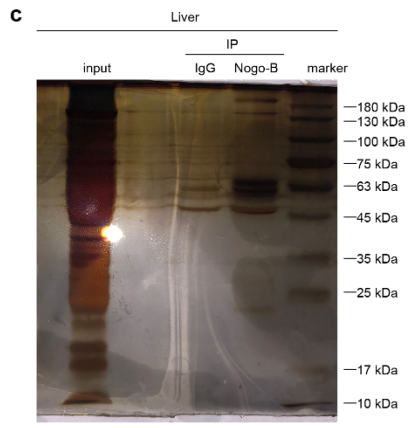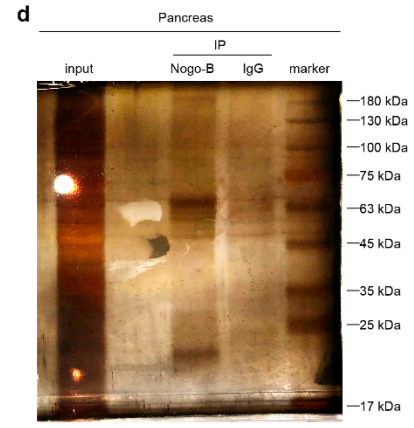

**e** Proteins identified by IP-MS in pancreas

| Protein IDs | Peptide counts (unique) | Protein names                                                                                                                                                                   | Gene names | Score  | iBAQ peptides | iBAQ     |
|-------------|-------------------------|---------------------------------------------------------------------------------------------------------------------------------------------------------------------------------|------------|--------|---------------|----------|
| P01326      | 1                       | Insulin-2; Insulin-2 B chain; Insulin-2 A chain                                                                                                                                 | Ins2       | 4.5565 | 4             | 7083600  |
| P55095      | 3                       | Glucagon; Glucagon-related polypeptide; Oxyntomodulin; Glucagon; Glucagon-like peptide 1; Glucagon-like peptide 1(7-37); Glucagon-like peptide 1(7-36); Glucagon-like peptide 2 | Gcg        | 34.488 | 9             | 22687000 |

**Supplementary Figure 6. Immunoprecipitation-mass spectrometry (IP-MS) assays. a, b,** Sequence comparisons between Nogo-B and proGCG or insulin in different species. **c, d,** IP-silver staining assays with a Nogo-B antibody using extracts from excised liver and pancreas samples from C57BL/6J mice. **e,** IP-MS results showed that Nogo-B interacts with insulin and proGCG in the pancreas.

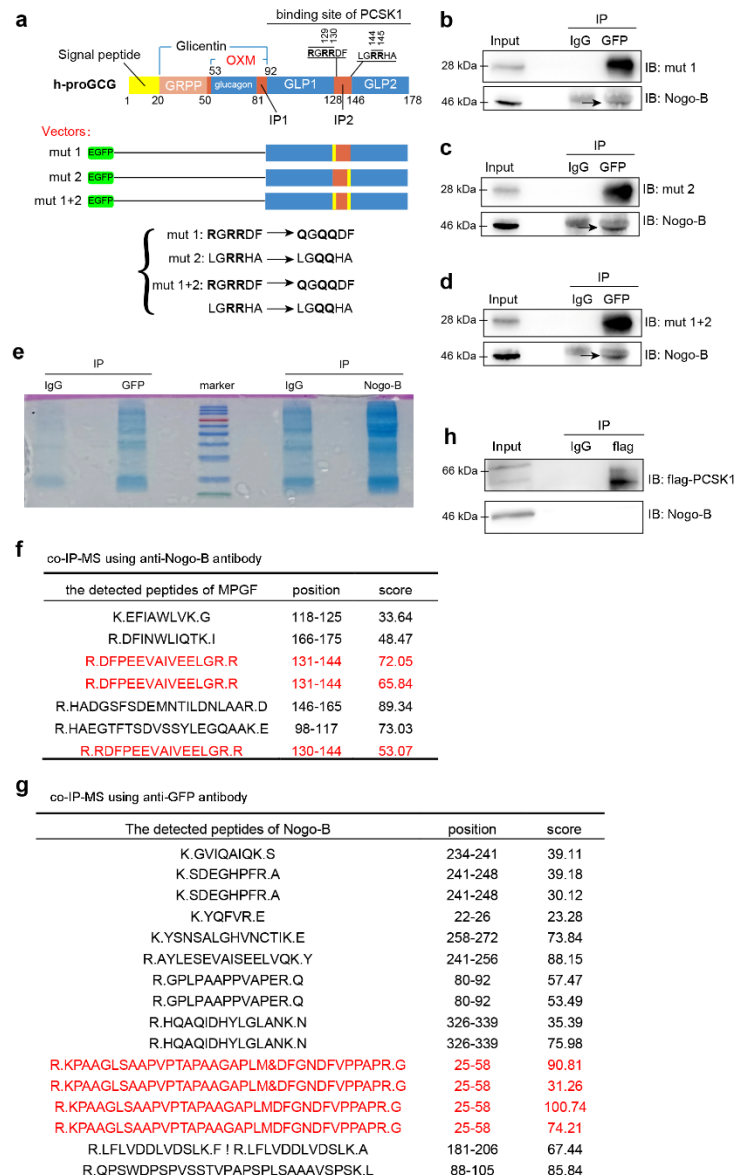

**Supplementary Figure 7. co-IP detection of peptide mutations in the PCSK1 binding site and co-IP-MS detection.** **a**, Construction of EGFP-tagged expression vectors for MPGF with PCSK1 shear site mutations. **b-c**, Immunoprecipitation assay with Nogo-B and MPFG with PCSK1 shear site mutations (n = 3 biological replicates). **e**, co-IP products stained with Coomassie Brilliant Blue staining. **f**, proGCG peptide conjugated to Nogo-B obtained using Nogo-B antibody (n = 3 biological replicates). **g**, Nogo-B peptide conjugated to proGCG obtained using GFP antibody. **h**, Immunoprecipitation assay with Nogo-B and PCSK1. Source data are provided as a Source Data file.



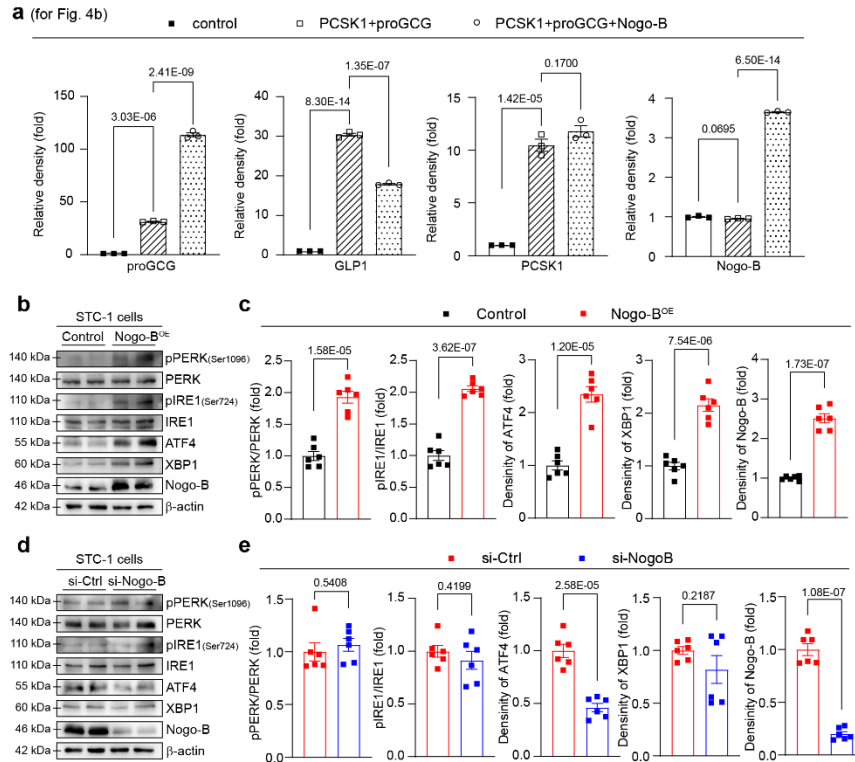

**Supplementary Figure 8. Effect of Nogo-B expression on the UPR.** **a**, Analysis of band density in Fig. 4b ( $n = 3$  biological replicates). **b-e**, Effect of Nogo-B expression on protein levels of pPERK, PERK, pIRE1, IRE1, ATF4, and XBP1 and analysis of band density. ( $n = 6$  biological replicates). Data are expressed as the mean  $\pm$  SEM. The  $p$  values were calculated by two-tailed Student's  $t$  test. Source data are provided as a Source Data file.

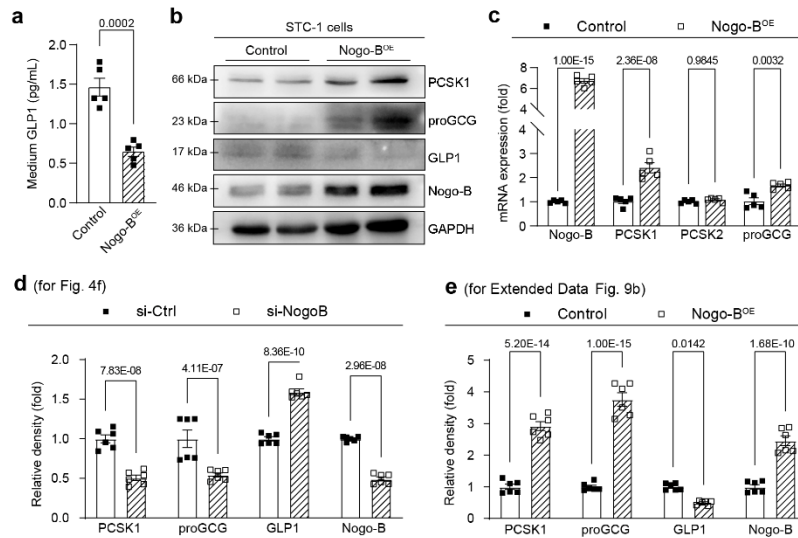

**Supplementary Figure 9. Effect of Nogo-B overexpression on GLP1 levels in STC-1 cells.** **a**, GLP1 levels in the culture medium of STC-1 cells transfected with empty vector (Control) or Nogo-B expression vector (Nogo-B<sup>OE</sup>) (n = 5 biological replicates). **b**, PCSK1, proGCG, GLP1 and Nogo-B protein levels in STC-1 cells transfected with Control or Nogo-B<sup>OE</sup> vector (n = 6 biological replicates). **c**, Nogo-B, PCSK1, PCSK2 and proGCG mRNA levels in STC-1 cells transfected with Control or Nogo-B<sup>OE</sup> vector (n = 5 biological replicates). **d**, **e**, Analysis of band density in Fig. 4f and Supplementary Figure 9b (n = 6 biological replicates) Data are expressed as the mean  $\pm$  SEM. The *p* values were calculated by two-tailed Student's *t* test. Source data are provided as a Source Data file.

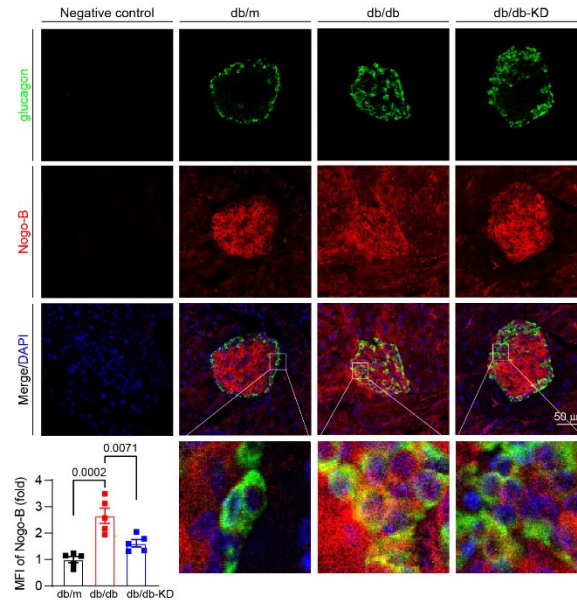

**Supplementary Figure 10. Localization and expression of Nogo-B in pancreas.** Representative images of immunofluorescence staining (glucagon, green; Nogo-B, red; DAPI, blue) of pancreas from db/m, db/db, and db/db-KD mice (n = 5 biological replicates). Data are expressed as the mean  $\pm$  SEM. The *p* values were calculated by one-way ANOVAs. Source data are provided as a Source Data file.

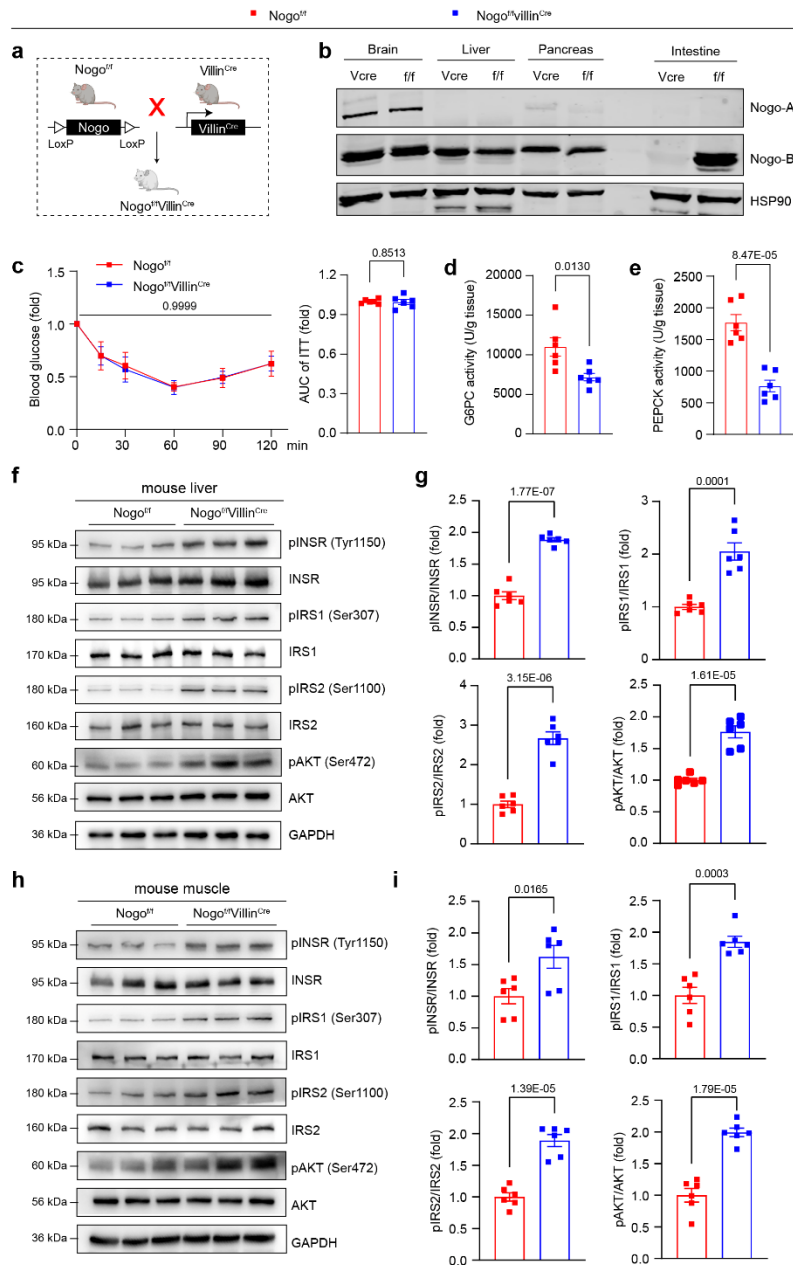

**Supplementary Figure 11. Intestinal Nogo-B knockout increases insulin sensitivity in mice.** **a**, A strategy for generating intestinal Nogo-selectively knockout mice ( $Nogo^{f/f}Villin^{Cre}$ ). **b**, Validation of intestinal Nogo-B-selective knockout in mice by Western blotting. **c**, ITT and AUC analysis of mice ( $n = 6$  mice per group). **d**, **e**, The enzyme activity of G6PC (**d**) and PEPCK (**e**) in the liver of  $Nogo^{f/f}Villin^{Cre}$  and  $Nogo^{f/f}$  mice ( $n = 6$  mice per group). **f-i**, pINSR, INSR, pIRS1, IRS1, pIRS2, IRS2, pAKT and AKT protein levels in mouse liver and muscle and analysis of band density ( $n = 6$  mice per group). Data are expressed as the mean  $\pm$  SEM. The  $p$  values were calculated by two-tailed Student's  $t$  test. Source data are provided as a Source Data file.

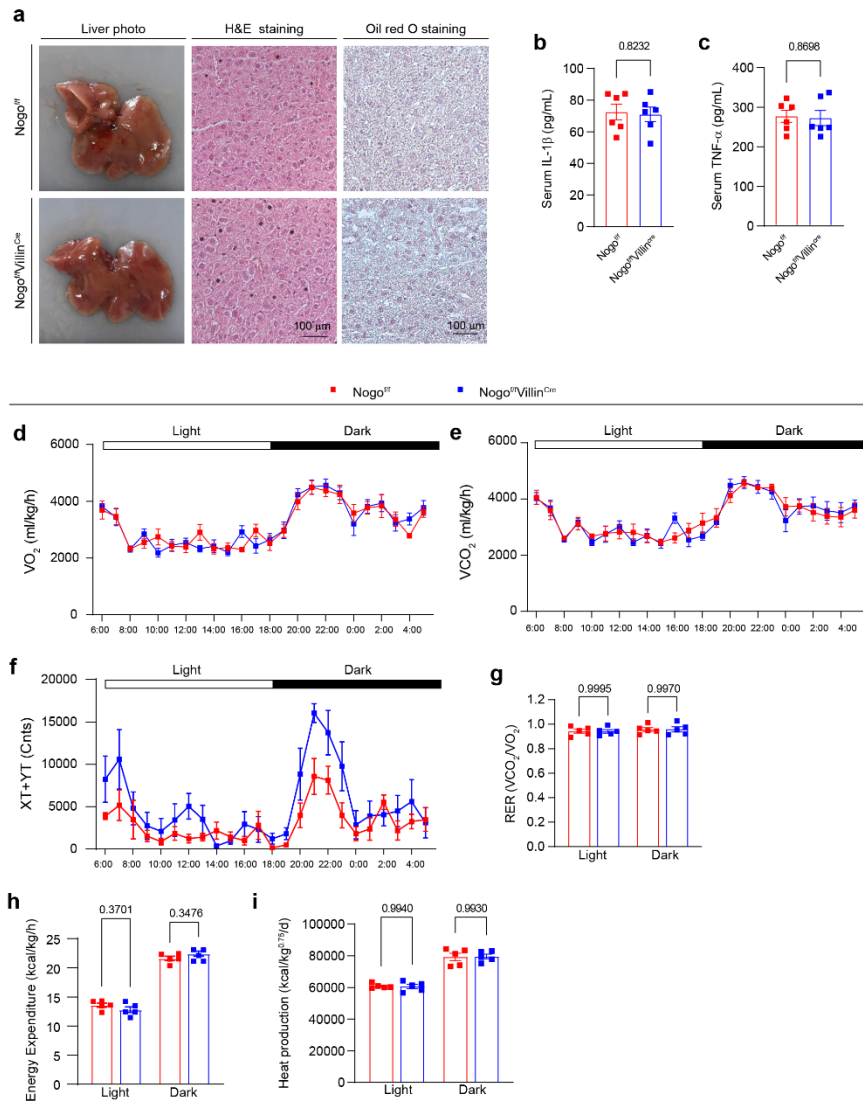

**Supplementary Figure 12. Intestinal Nogo-B knockout does not affect liver function and metabolism in mice.** **a**, Representative photographs of the whole liver, H&E and oil red O staining images of the liver sections of *Nogo<sup>ff</sup>Villin<sup>Cre</sup>* and *Nogo<sup>ff</sup>* mice. **b**, **c**, Serum IL-1 $\beta$  and TNF- $\alpha$  levels of *Nogo<sup>ff</sup>Villin<sup>Cre</sup>* and *Nogo<sup>ff</sup>* mice (n = 6 mice per group). **d**, **e**, The curves of O<sub>2</sub> consumption (**d**) and CO<sub>2</sub> production (**e**) of *Nogo<sup>ff</sup>Villin<sup>Cre</sup>* and *Nogo<sup>ff</sup>* mice (n = 5). **f**, The locomotor activity of *Nogo<sup>ff</sup>Villin<sup>Cre</sup>* and *Nogo<sup>ff</sup>* mice (n = 5 mice per group). **g-i**, The RER, energy expenditure, and heat production of *Nogo<sup>ff</sup>Villin<sup>Cre</sup>* and *Nogo<sup>ff</sup>* mice (n = 5 mice per group). Data are expressed as the mean  $\pm$  SEM. The *p* values were calculated by two-tailed Student's *t* test. Source data are provided as a Source Data file.

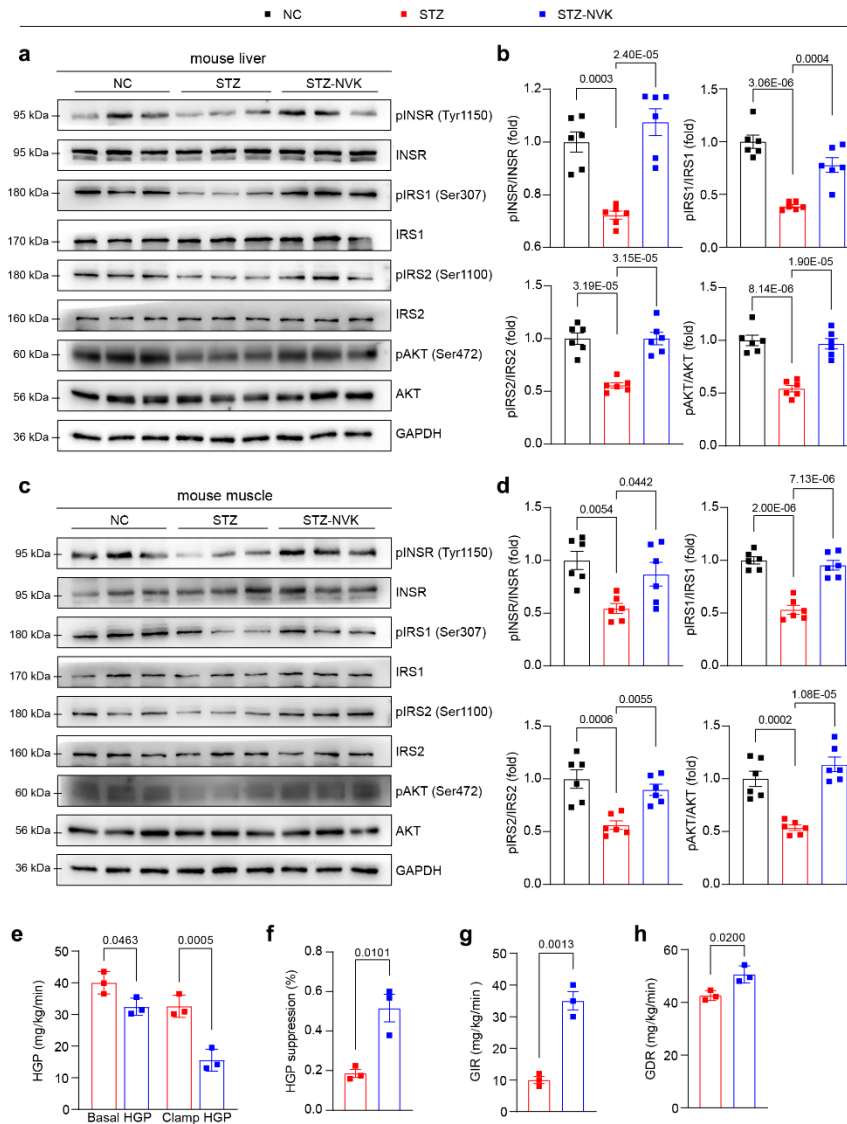

**Supplementary Figure 13. Intestinal Nogo-B knockout improved insulin sensitivity in STZ-induced T2DM mice.** **a-d**, pINSR, INSR, pIRS1, IRS1, pIRS2, IRS2, pAKT and AKT protein levels in mouse liver and muscle and analysis of band density ( $n = 6$  mice per group). **e**, HGP under basal and clamp conditions of mice ( $n = 3$  mice per group). **f-h**, HGP suppression (**f**), glucose infusion rate GIR (**g**), and GDR (**h**) of mice ( $n = 3$  mice per group). Data are expressed as the mean  $\pm$  SEM. The  $p$  values of (**b, d**) were calculated by one-way ANOVAs. The  $p$  values of (**e-h**) were calculated by two-tailed Student's  $t$ -test. Source data are provided as a Source Data file.

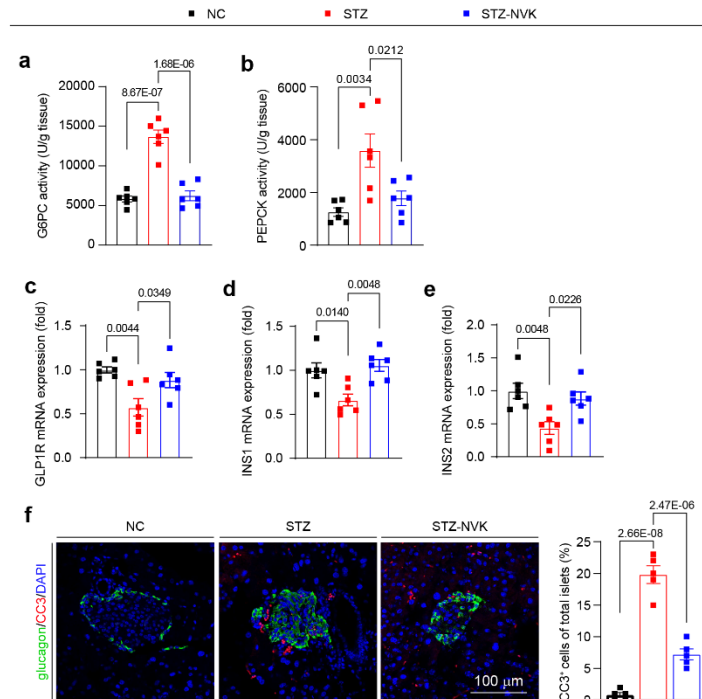

**Supplementary Figure 14. Intestinal Nogo-B knockout recovered STZ-induced T2DM symptom.** **a, b**, The enzyme activity of G6PC (**a**) and PEPCK (**b**) in the liver of mice in NC, STZ, and STZ-NVK groups ( $n = 6$  mice per group). **c-e**, The mRNA levels of GLP1R, INS1, and INS2 in the pancreas of mice in NC, STZ, and STZ-NVK groups ( $n = 6$  mice per group). **e**, Islet images of mice in NC, STZ, and STZ-NVK groups (CC3, caspase 3, red; glucagon, green; DAPI, blue) and analysis of CC3<sup>+</sup> cells as the percentage of pancreatic cells after siRNA injection ( $n = 6$  mice per group). Data are expressed as the mean  $\pm$  SEM. The  $p$  values of were calculated by one-way ANOVAs. Source data are provided as a Source Data file.

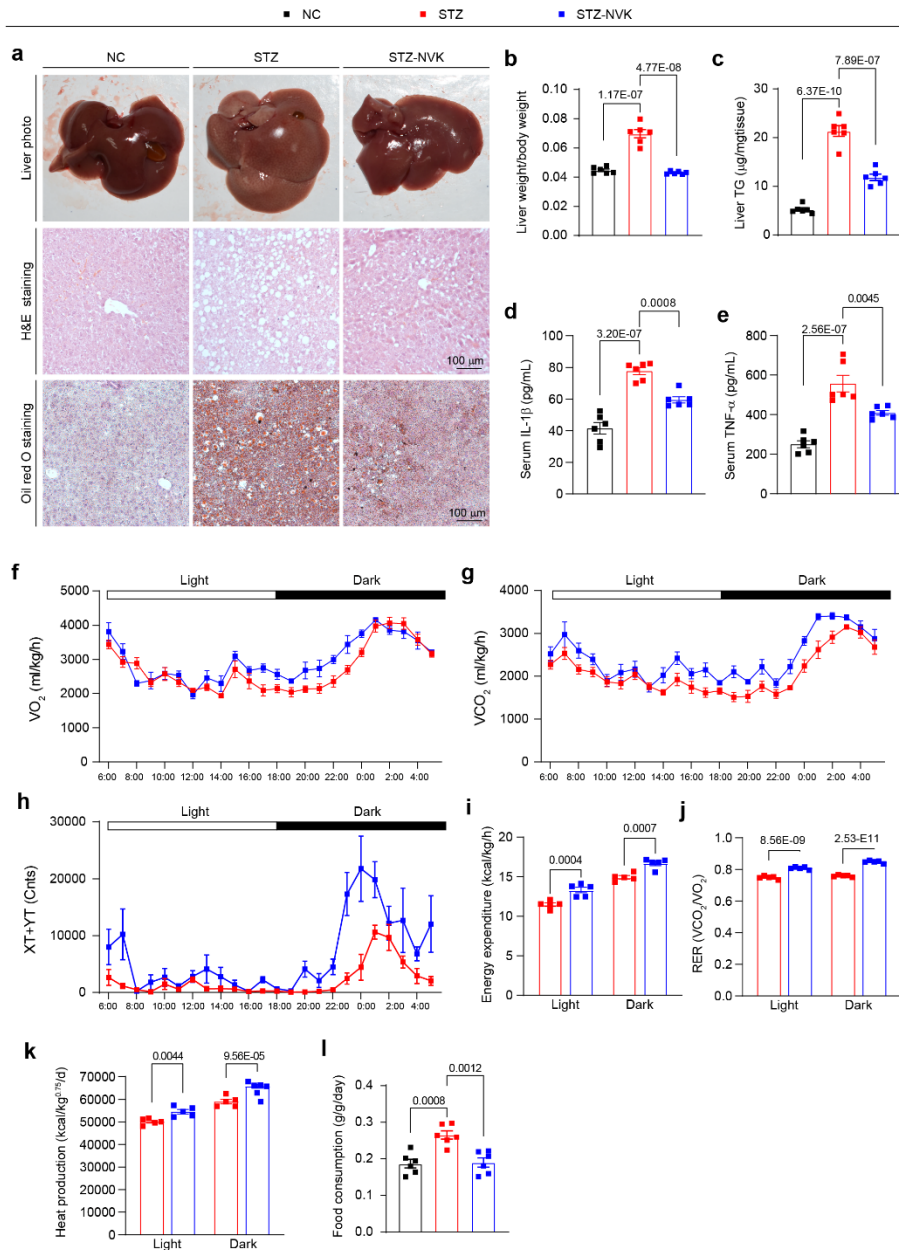

**Supplementary Figure 15. Intestinal Nogo-B knockout reduced liver injury and lipid accumulation in mice with T2DM induced by STZ.** **a**, Representative photographs of the whole liver, H&E and oil red O staining images of mice in NC, STZ, and STZ-NVK groups. **b**, Liver weight to body weight of mice in NC, STZ, and STZ-NVK groups (n = 6 mice per group). **c**, Liver TG levels of mice in NC, STZ, and STZ-NVK groups (n = 6 mice per group). **d**, **e**, Serum IL-1β and TNF-α levels of mice in NC, STZ, and STZ-NVK groups (n = 6 mice per group). **f**, **g**, The curves of O<sub>2</sub> consumption (**f**) and CO<sub>2</sub> production (**g**) of mice in NC, STZ, and STZ-NVK groups (n = 5 mice per group). **h**, The locomotor activity of mice in NC, STZ, and STZ-NVK groups (n = 5 mice per group). **i-k**, The RER, energy expenditure, and heat production of mice in NC, STZ, and STZ-NVK groups (n = 5 mice per group). **l**, Food consumption of mice in NC, STZ, and STZ-NVK groups (n = 6 mice per group). Data are expressed as the mean ± SEM. The *p* values were calculated by one-way ANOVAs. Source data are provided as a Source Data file.



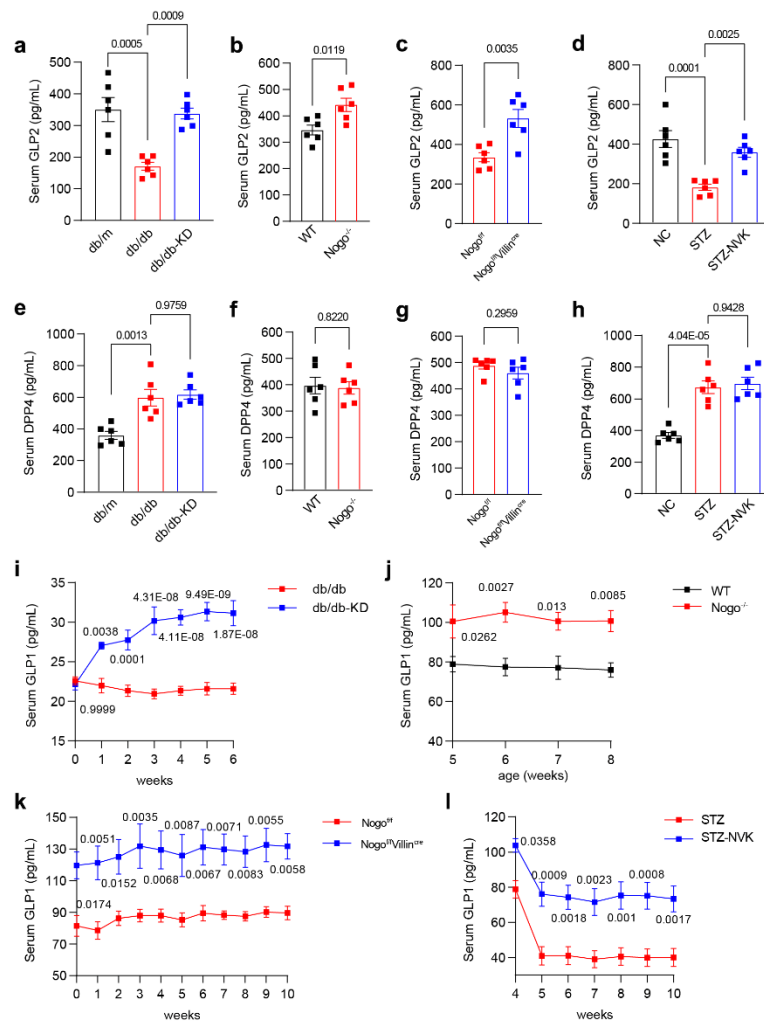

**Supplementary Figure 16. Effect of Nogo-B expression on GLP2, DPP4 and weekly GLP1 levels.** **a-d**, Effect of Nogo-B expression on serum GLP2 levels (n = 6 mice per group). **e-h**, Effect of Nogo-B expression on serum DPP4 levels (n = 6 mice per group). **i-l**, Effect of Nogo-B expression on weekly serum GLP1 levels. (n = 6 mice per group). Data are expressed as the mean ± SEM. The *p* values of (**a-d**, **i-l**) were calculated by one-way ANOVAs. The *p* values of (**e-h**) were calculated by two-tailed Student's t-test. Source data are provided as a Source Data file.

**Supplementary Tables:**

**Table S1. siRNA-mediated knockdown of Nogo-B ameliorates hyperlipidemia and liver injury in db/db mice**

|                       | db/m         | db/db       | <i>p</i> (db/m vs. db/db) | db/db-KD     | <i>p</i> (db/db vs. db/db-KD) |
|-----------------------|--------------|-------------|---------------------------|--------------|-------------------------------|
| Triglyceride (mmol/L) | 1.19 ± 0.22  | 4.02 ± 0.41 | 2.69E-07                  | 2.09 ± 0.21  | 0.0004                        |
| Cholesterol (mmol/L)  | 2.81 ± 0.38  | 3.26 ± 0.26 | 0.4963                    | 3.14 ± 0.16  | 0.9388                        |
| LDL-C (mmol/L)        | 0.21 ± 0.03  | 0.32 ± 0.03 | 0.1148                    | 0.34 ± 0.04  | 0.9539                        |
| HDL-C (mmol/L)        | 2.35 ± 0.05  | 1.17 ± 0.13 | 4.89E-07                  | 1.67 ± 0.07  | 0.0044                        |
| ALT (U/L)             | 38.1 ± 4.1   | 127 ± 10.8  | 1.90E-05                  | 88.1 ± 11.3  | 0.0255                        |
| AST (U/L)             | 188.5 ± 21.5 | 244.6 ± 9.4 | 0.0866                    | 199.8 ± 18.5 | 0.1905                        |
| ALP (U/L)             | 53.4 ± 1.8   | 101 ± 4.3   | 4.80E-07                  | 72.6 ± 4.4   | 0.0002                        |

The results are expressed as means ± SEM, the *p* values were calculated by one-way ANOVAs (n=6 mice per group).

**Table S2. Intestinal Nogo knockout has no effect on blood lipid and transaminase levels in mice fed a high-glucose diet**

|                       | Nogo <sup>ff</sup> | Nogo <sup>ff</sup> Villin <sup>Cre</sup> | <i>p</i> (Nogo <sup>ff</sup> vs. Nogo <sup>ff</sup> Villin <sup>Cre</sup> ) |
|-----------------------|--------------------|------------------------------------------|-----------------------------------------------------------------------------|
| Triglyceride (mmol/L) | 1.12 ± 0.05        | 1.21 ± 0.05                              | 0.2319                                                                      |
| Cholesterol (mmol/L)  | 4.14 ± 0.38        | 4.48 ± 0.44                              | 0.621                                                                       |
| LDL-C (mmol/L)        | 0.38 ± 0.04        | 0.39 ± 0.01                              | 0.8946                                                                      |
| HDL-C (mmol/L)        | 1.8 ± 0.06         | 1.77 ± 0.16                              | 0.8571                                                                      |
| ALT (U/L)             | 81.12 ± 5.1        | 75.96 ± 2.76                             | 0.449                                                                       |
| AST (U/L)             | 251.04 ± 7.6       | 264.3 ± 49                               | 0.8172                                                                      |
| ALP (U/L)             | 76.02 ± 3.3        | 74.64 ± 1.6                              | 0.7443                                                                      |

The results are expressed as means ± SEM, the *p* values were calculated by two-tailed Student's t test (n=6 mice per group).

**Table S3 Intestinal Nogo knockout ameliorates hyperlipidemia and liver injury in STZ-induced T2DM mice**

|                       | NC          | STZ          | <i>p</i> (NC vs. STZ) | STZ-NVK     | <i>p</i> (STZ vs. STZ-NVK) |
|-----------------------|-------------|--------------|-----------------------|-------------|----------------------------|
| Triglyceride (mmol/L) | 3.5 ± 0.12  | 5.92 ± 0.29  | 1.27E-06              | 4.15 ± 0.06 | 5.05E-05                   |
| Cholesterol (mmol/L)  | 2.75 ± 0.1  | 6.33 ± 0.37  | 2.25E-07              | 4.51 ± 0.16 | 0.0006                     |
| LDL-C (mmol/L)        | 0.3 ± 0.01  | 0.92 ± 0.08  | 1.04E-06              | 0.49 ± 0.02 | 7.78E-05                   |
| HDL-C (mmol/L)        | 1.26 ± 0.07 | 2.04 ± 0.12  | 0.0003                | 1.97 ± 0.11 | 0.8748                     |
| ALT (U/L)             | 80.9 ± 0.9  | 236.7 ± 12.9 | 1.02E-07              | 94.96 ± 11  | 3.50E-07                   |

|           |              |              |        |              |        |
|-----------|--------------|--------------|--------|--------------|--------|
| AST (U/L) | 160.9 ± 15.9 | 295.7 ± 18.4 | 0.0002 | 206.2 ± 14.2 | 0.0077 |
| ALP (U/L) | 103.8 ± 7.2  | 131.8 ± 6.5  | 0.0271 | 102.1 ± 4.7  | 0.0194 |

The results are expressed as means ± SEM, the *p* values were calculated by one-way ANOVAs (n=6 mice per group).

**Table S4. Sequences of the primers for qPCR and siRNA.**

| Gene                | Forward                       | Reward                        |
|---------------------|-------------------------------|-------------------------------|
| <i>Species: mus</i> |                               |                               |
| <i>FBP1</i>         | GGATATCAGCACCTGACCC           | AGCGATACCATAGAGCTGTGC         |
| <i>G6PC</i>         | AGACTCCCAGGACTGGTTCA          | CTGCCACCCAGAGGAGATTG          |
| <i>GAPDH</i>        | TGTTTCCTCGTCCCGTAG            | CAATCTCCACTTTGCCACT           |
| <i>GCK</i>          | TGAGCCGGATGCAGAAGGA           | GCAACATCTTTACTACTGGCCT        |
| <i>GLP1R</i>        | TTCACTTCCTTCCAGGGCTTG         | CTGCTGGTGGGACACTTGAG          |
| <i>HK</i>           | GGCAAACATCCATTCTGTGACT        | AGCGGGGTTTTCTGATCCTTGA        |
| <i>INS1</i>         | GGGCCAAACAGCAAAGTCCA          | CCATGTTGAAACAATGACCTGC        |
| <i>INS2</i>         | CAGCAAGCAGGAAGTTATTGT         | CAGGTGGGAACCACAAAGGT          |
| <i>LDH</i>          | AACTTGGCGCTCTACTTGCT          | GGACTTTGAATCTTTTGAGACCTTG     |
| <i>Nogo-B</i>       | TCGGGCTCAGTGGTTGTT            | GAGACAGCAGCAGGAATAAGCT        |
| <i>PCK1</i>         | CTGCATAACGGTCTGGACTTC         | CAGCAACTGCCCGTACTCC           |
| <i>PCSK1</i>        | CTTTCGCCTTCTTTTGC GTTT        | TCCGCCGCCCATTCATTAAC          |
| <i>PCSK2</i>        | AGAGAGACCCCAGGATAAAGATG       | CTTGCCAGTGTGTAACAGGT          |
| <i>PFKL</i>         | ATTCATTCTGAAGCGCCCC           | CTGTGGTTCTGGAGGCATCCTT        |
| <i>PK</i>           | TATCGCAGCAGGAACCGAAG          | GCATGGTTCCTGAAGTCCTTTG        |
| <i>proGCG</i>       | TTACTTTGTGGCTGGATTGCTT        | AGTGGCGTTTGTCTTCATTCA         |
| siRNA               | sense                         | antisense                     |
| si-Ctrl             | 5'-UUCUCCGAACGUGUCACGUdTdT-3' | 5'-ACGUGACACGUUCGGAGAAdTdT-3' |
| si-Nogo-B #1        | 5'-GGAUCUCAUUGUAGUCAUATT-3'   | 5'-UAUGACUACAAUGAGAUCCTT-3'   |
| si-Nogo-B #2        | 5'-GCAGUGUUGAUGUGGGUAAUUTT-3' | 5'-AAAUACCCACAUCAACACUGCTT-3' |
| si-Nogo-B #3        | 5'-CACAUAAACUAGGAAGAGATT-3'   | 5'-UCUCUCCUAGUUUAUGUGTT-3'    |

**Table S5. Sequences of the Recombinant DNA**

| peptides  | Oligonucleotides                                                                |
|-----------|---------------------------------------------------------------------------------|
| h-Nogo-B  | NM_153828.3:152-1273 Homo sapiens reticulon 4                                   |
| h-proGCG  | NM_002054.5:100-642 Homo sapiens glucagon                                       |
| h-insulin | NM_000207.3:60-392 Homo sapiens insulin                                         |
| h-PCSK1   | NM_000439.5:207-2468 Homo sapiens proprotein convertase subtilisin/kexin type 1 |

|           |                                                                                                                                                                                                                                                                                                 |
|-----------|-------------------------------------------------------------------------------------------------------------------------------------------------------------------------------------------------------------------------------------------------------------------------------------------------|
| h-GRPP    | ATGCGTTCCTTCAAGACACAGAGGAGAAATCCAGATCATTCTCAGCTTCCCAGGCAGACCC<br>ACTCAGTGATCCTGATCAGATGAACGAGGAC                                                                                                                                                                                                |
| h-GCG     | ATGCATTACAGGGCACATTCACCAGTGACTACAGCAAGTATCTGGACTCCAGGCGTGCCCA<br>AGATTTTGTGCAGTGGTTGATGAATACC                                                                                                                                                                                                   |
| h-GLP1    | ATGCACGATGAATTTGAGAGACATGCTGAAGGGACCTTACCAGTGATGTAAGTTCTTATTTGG<br>AAGGCCAAGCTGCCAAGGAATTCATTGCTTGGCTGGTGAAGGCCGAGGA                                                                                                                                                                            |
| h-GLP2    | ATGCATGCTGATGGTTCTTCTCTGATGAGATGAACACCATTCTTGATAATCTTGCCGCCAGGG<br>ACTTTATAAACTGGTTGATTCAGACCAAATCACTGAC                                                                                                                                                                                        |
| h-GLI     | ATGAAAAGCATTACTTTGTGGCTGGATTATTTGTAATGCTGGTACAAGGCAGCTGGCAACGTT<br>CCCTTCAAGACACAGAGGAGAAATCCAGATCATTCTCAGCTTCCCAGGCAGACCCACTCAGT<br>GATCCTGATCAGATGAACGAGGACAAGCGCCATTACAGGGCACATTCACCAGTGACTACAG<br>CAAGTATCTGGACTCCAGGCGTGCCCAAGATTTTGTGCAGTGGTTGATGAATACCAAGAGGAA<br>CAGGAATAACATTGCCAAACGT |
| h-MPGF    | ATGCACGATGAATTTGAGAGACATGCTGAAGGGACCTTACCAGTGATGTAAGTTCTTATTTGG<br>AAGGCCAAGCTGCCAAGGAATTCATTGCTTGGCTGGTGAAGGCCCGAGGAAGGCCGAGATTT<br>CCCAGAAGAGGTCGCCATTGTTGAAGAACTTGGCCGCGACATGCTGATGGTTCTTCTCTG<br>ATGAGATGAACACCATTCTTGATAATCTTGCCGCCAGGGACTTTATAAACTGGTTGATTCAGAC<br>CAAATCACTGAC           |
| mut1      | ATGCACGATGAATTTGAGAGACATGCTGAAGGGACCTTACCAGTGATGTAAGTTCTTATTTGG<br>AAGGCCAAGCTGCCAAGGAATTCATTGCTTGGCTGGTGAAGGCCCAAGGACAGCAAGATTTCC<br>CAGAAGAGGTCGCCATTGTTGAAGAACTTGGCCGCGACATGCTGATGGTTCTTCTCTGAT<br>GAGATGAACACCATTCTTGATAATCTTGCCGCCAGGGACTTTATAAACTGGTTGATTCAGACCA<br>AAATCACTGAC           |
| mut2      | ATGCACGATGAATTTGAGAGACATGCTGAAGGGACCTTACCAGTGATGTAAGTTCTTATTTGG<br>AAGGCCAAGCTGCCAAGGAATTCATTGCTTGGCTGGTGAAGGCCCGAGGAAGGCCGAGATTT<br>CCCAGAAGAGGTCGCCATTGTTGAAGAACTTGGCCGCGACATGCTGATGGTTCTTCTCTG<br>ATGAGATGAACACCATTCTTGATAATCTTGCCGCCAGGGACTTTATAAACTGGTTGATTCAGAC<br>CAAATCACTGAC           |
| mut1+mut2 | ATGCACGATGAATTTGAGAGACATGCTGAAGGGACCTTACCAGTGATGTAAGTTCTTATTTGG<br>AAGGCCAAGCTGCCAAGGAATTCATTGCTTGGCTGGTGAAGGCCCAAGGACAGCAAGATTTCC<br>CAGAAGAGGTCGCCATTGTTGAAGAACTTGGCCGCGACATGCTGATGGTTCTTCTCTGAT<br>GAGATGAACACCATTCTTGATAATCTTGCCGCCAGGGACTTTATAAACTGGTTGATTCAGACCA<br>AAATCACTGAC           |
| mut-F     | ATGCACGATGAATTTGAGAGACATGCTGAAGGGACCTTACCAGTGATGTAAGTTCTTATTTGG<br>AAGGCCAAGCTGCCAAGGAATTCATTGCTTGGCTGGTGAAGGCCGAGGAAGGCCGAGATGC<br>CCAGAAGAGGTCGCCATTGTTGAAGAACTTGGCCGCGACATGCTGATGGTTCTTCTCTG<br>ATGAGATGAACACCATTCTTGATAATCTTGCCGCCAGGGACTTTATAAACTGGTTGATTCAGAC<br>CAAATCACTGAC             |
| mut-E     | ATGCACGATGAATTTGAGAGACATGCTGAAGGGACCTTACCAGTGATGTAAGTTCTTATTTGG<br>AAGGCCAAGCTGCCAAGGAATTCATTGCTTGGCTGGTGAAGGCCGAGGAAGGCCGAGATTT                                                                                                                                                                |

CCCA**GCCGCC**GTCGCCATTGTT**GCCGCC**CTTGCCGCAGACATGCTGATGGTTCTTCTCTG  
 ATGAGATGAACACCATTCTTGATAATCTTGCCGCCAGGGACTTTATAAACTGGTTGATTCAGAC  
 CAAAATCACTGAC

mut-L

ATGCACGATGAATTTGAGAGACATGCTGAAGGGACCTTACCAGTGATGTAAGTTCTTATTTGG  
 AAGCCAAGCTGCCAAGGAATTCATTGCTTGGCTGGTGAAGGCCGAGGAAGGCCGAGATTT  
 CCCAGAAGAGGTCGCCATTGTTGAAGAA**GCC**GGCCGCAGACATGCTGATGGTTCTTCTCTG  
 ATGAGATGAACACCATTCTTGATAATCTTGCCGCCAGGGACTTTATAAACTGGTTGATTCAGAC  
 CAAAATCACTGAC

**Table S6. The characteristic of patients.**

|              | No. | Gender | Blood glucose (mmol/L) |
|--------------|-----|--------|------------------------|
| without T2DM | 1   | female | 5.64                   |
|              | 2   | female | 5.46                   |
|              | 3   | male   | 4.8                    |
|              | 4   | male   | 4.61                   |
|              | 5   | female | 6.12                   |
| with T2DM    | 6   | female | 7.12                   |
|              | 7   | female | 19.46                  |
|              | 8   | female | 5.59                   |
|              | 9   | male   | 8.24                   |
|              | 10  | male   | 9.03                   |

**Figure 1n:**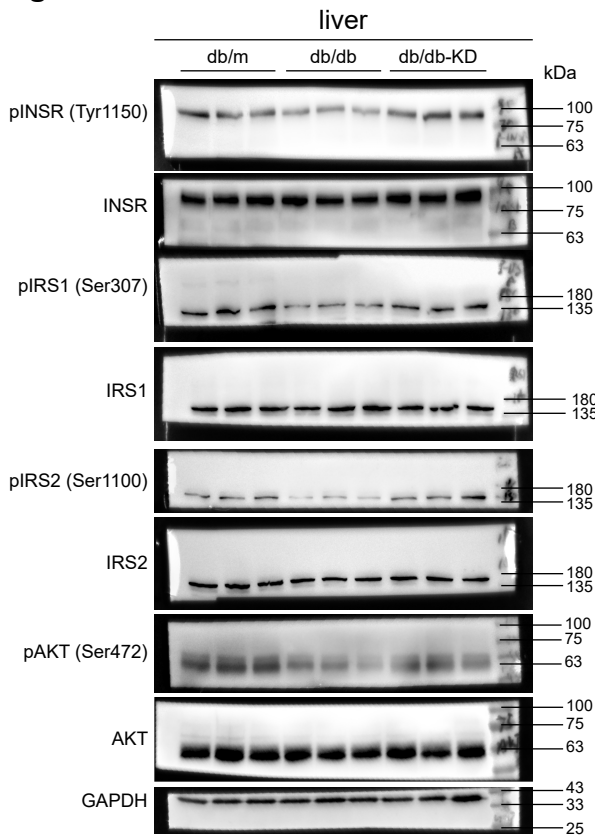**Figure 2j:**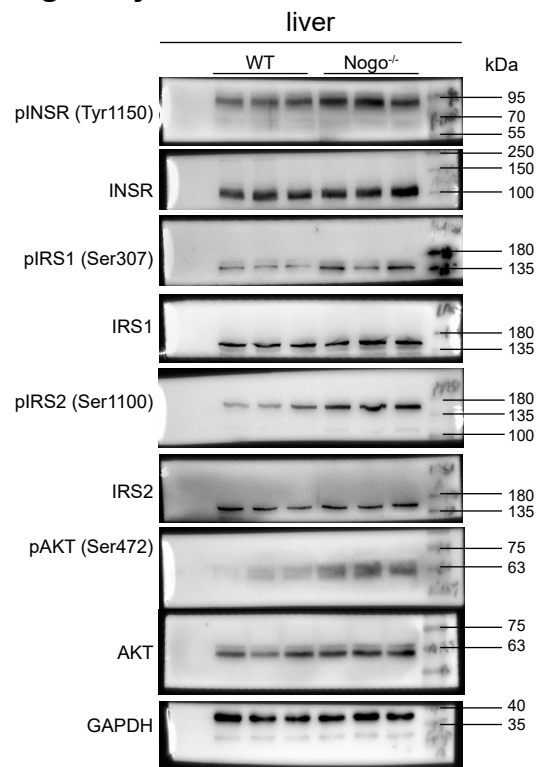**Figure 3b:**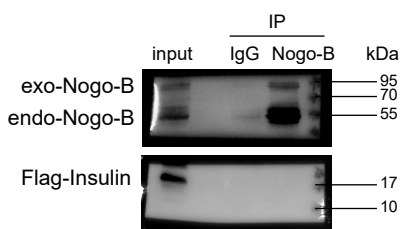**Figure 3c:**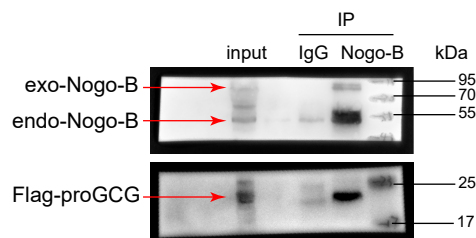**Figure 3d:**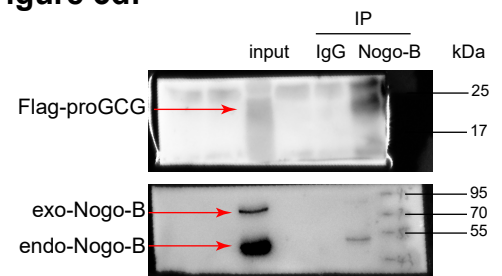**Figure 3f:**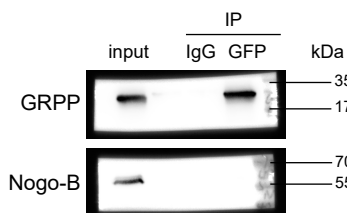**Figure 3g:**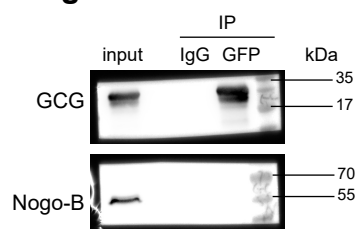**Figure 3h:**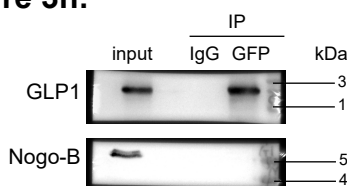**Figure 3i:**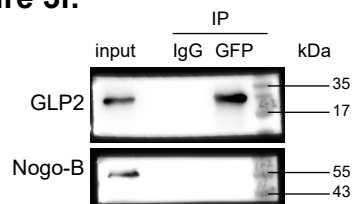

**Figure 3k:**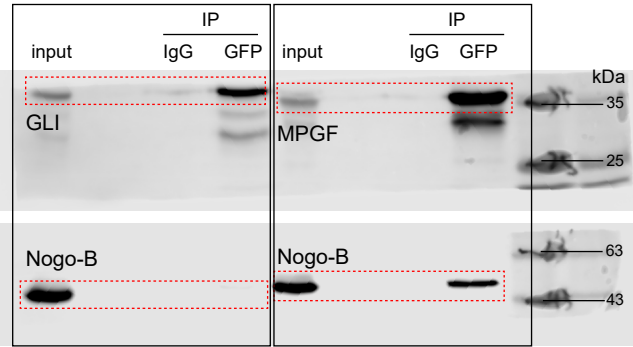**Figure 3l:**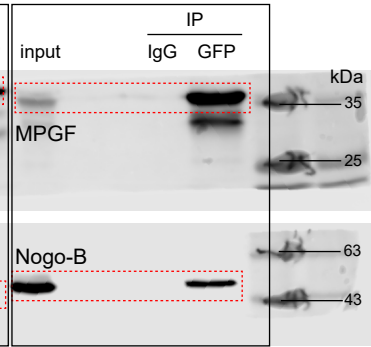**Figure 3n:**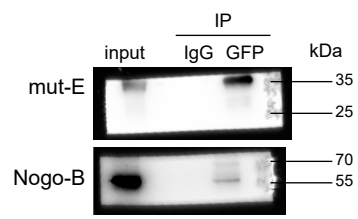**Figure 3o:**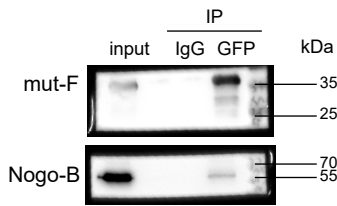**Figure 3p:**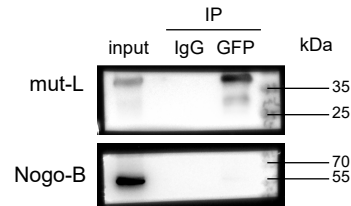**Figure 4b:**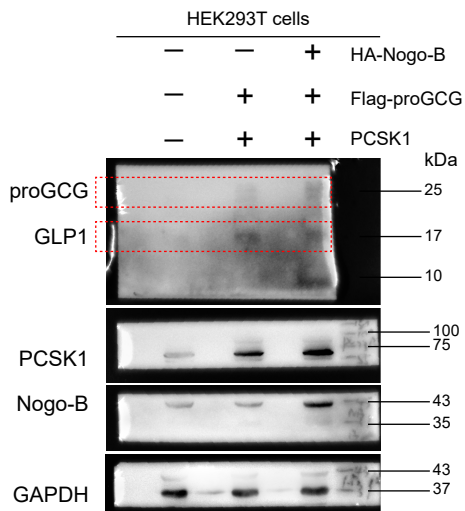**Figure 4c:**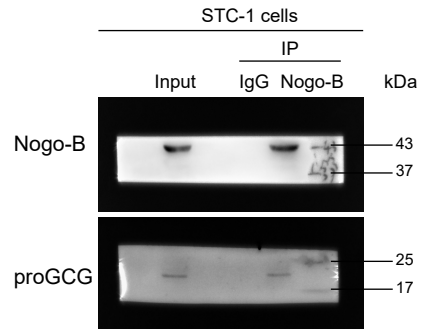**Figure 4f:**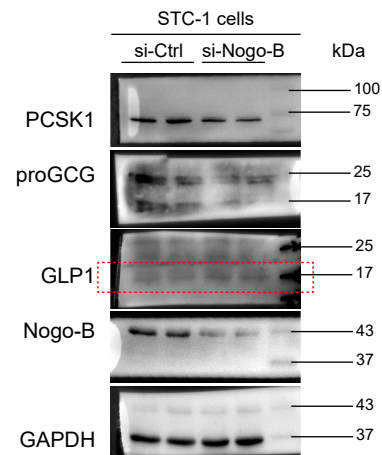

### Supplementary Figure 1a:

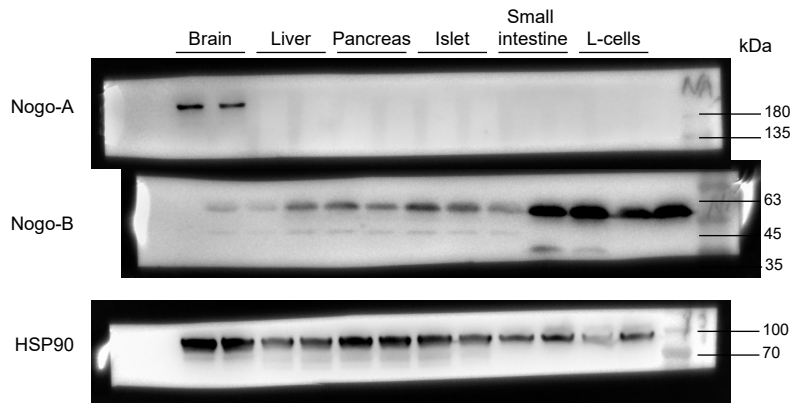

### Supplementary Figure 1b:

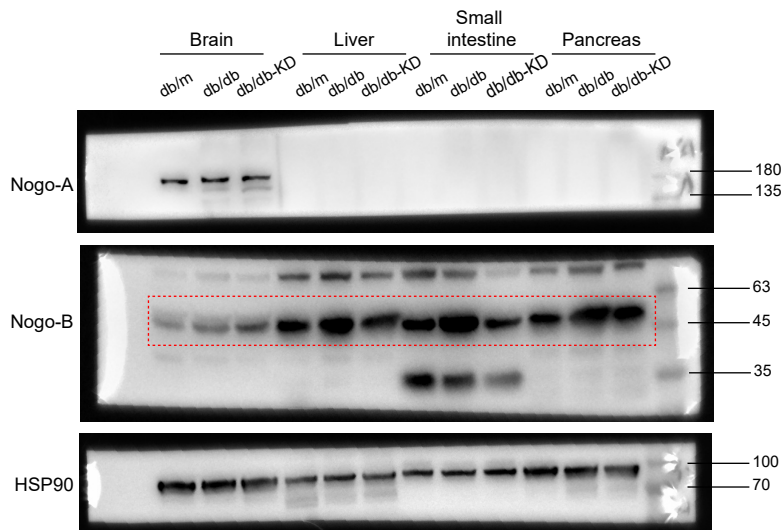

### Supplementary Figure 2b:

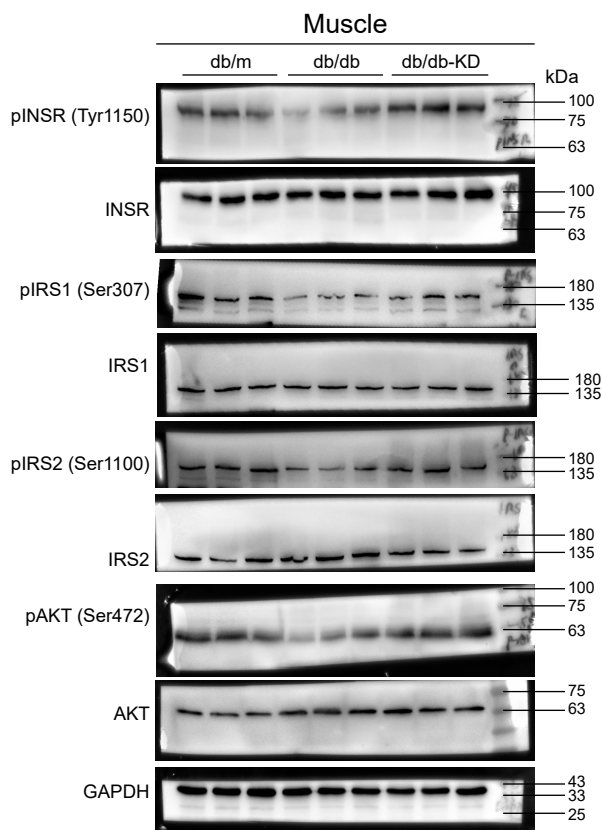



**Supplementary Figure 4a:**

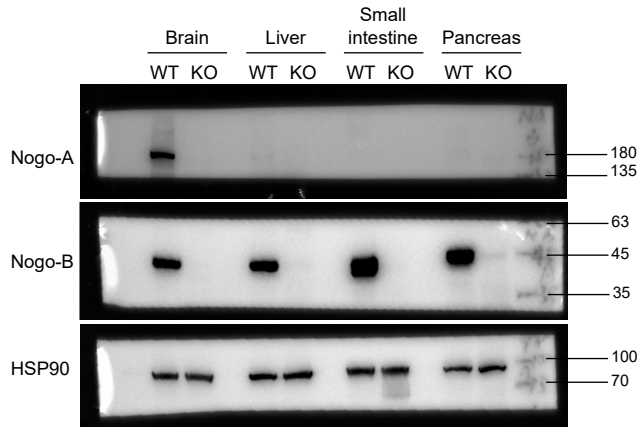

**Supplementary Figure 5b:**

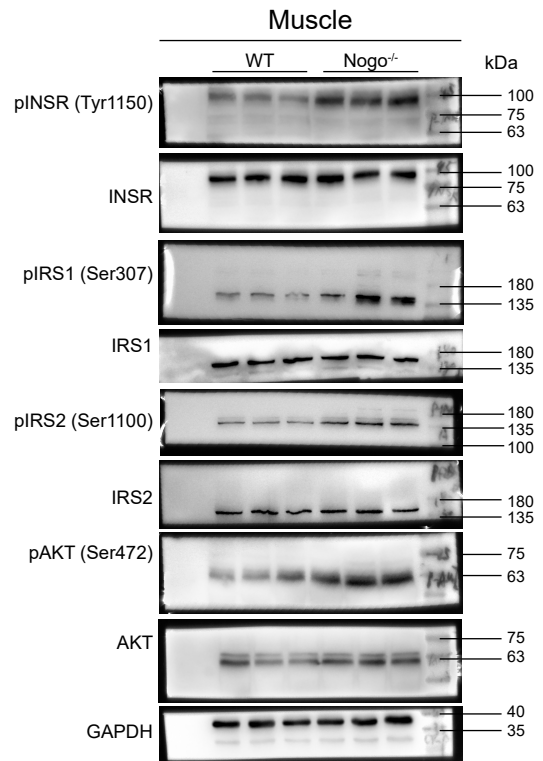

**Supplementary Figure 7b:**

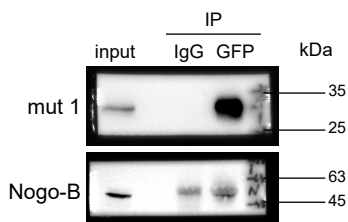

**Supplementary Figure 7c:**

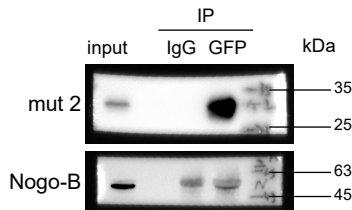

**Supplementary Figure 7d:**

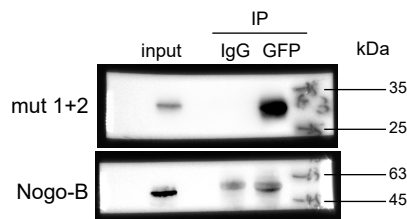

**Supplementary Figure 7e:**

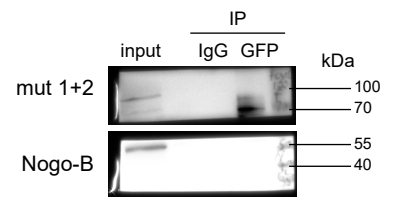

**Supplementary Figure 8b:**

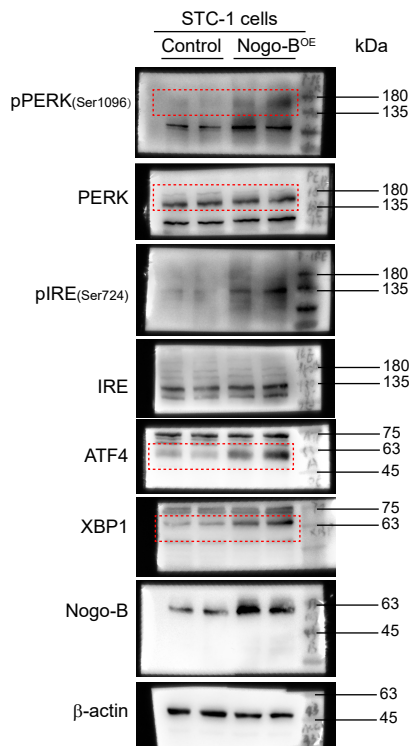

**Supplementary Figure 8d:**

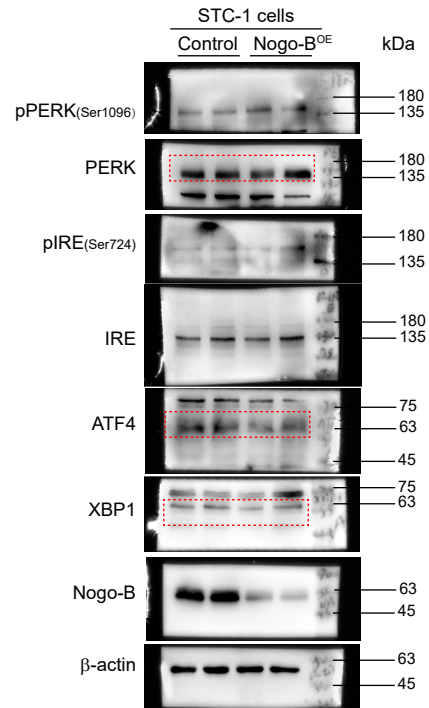

Supplement: 41467_2024_51352_MOESM1_ESM.pdf [file 41467_2024_51352_MOESM1_ESM.pdf]
