# Supplementary material for: Intestinal Nogo-B reduces GLP1 levels by binding to proglucagon on the endoplasmic reticulum to inhibit PCSK1 cleavage
Source: PubMed Central journal article supplement — Nat Commun. 2024 Aug 10;15:6845. doi: 10.1038/s41467-024-51352-3 (PMC11315690; doi:10.1038/s41467-024-51352-3), 2024-08-10
Supplement: 41467_2024_51352_MOESM3_ESM.pdf [file 41467_2024_51352_MOESM3_ESM.pdf]

## Reporting Summary

Nature Portfolio wishes to improve the reproducibility of the work that we publish. This form provides structure for consistency and transparency in reporting. For further information on Nature Portfolio policies, see our [Editorial Policies](#) and the [Editorial Policy Checklist](#).

### Statistics

For all statistical analyses, confirm that the following items are present in the figure legend, table legend, main text, or Methods section.

| n/a                                 | Confirmed                                                                                                                                                                                                                                                                                      |
|-------------------------------------|------------------------------------------------------------------------------------------------------------------------------------------------------------------------------------------------------------------------------------------------------------------------------------------------|
| <input type="checkbox"/>            | <input checked="" type="checkbox"/> The exact sample size ( $n$ ) for each experimental group/condition, given as a discrete number and unit of measurement                                                                                                                                    |
| <input type="checkbox"/>            | <input checked="" type="checkbox"/> A statement on whether measurements were taken from distinct samples or whether the same sample was measured repeatedly                                                                                                                                    |
| <input type="checkbox"/>            | <input checked="" type="checkbox"/> The statistical test(s) used AND whether they are one- or two-sided<br><i>Only common tests should be described solely by name; describe more complex techniques in the Methods section.</i>                                                               |
| <input checked="" type="checkbox"/> | <input type="checkbox"/> A description of all covariates tested                                                                                                                                                                                                                                |
| <input type="checkbox"/>            | <input checked="" type="checkbox"/> A description of any assumptions or corrections, such as tests of normality and adjustment for multiple comparisons                                                                                                                                        |
| <input type="checkbox"/>            | <input checked="" type="checkbox"/> A full description of the statistical parameters including central tendency (e.g. means) or other basic estimates (e.g. regression coefficient) AND variation (e.g. standard deviation) or associated estimates of uncertainty (e.g. confidence intervals) |
| <input type="checkbox"/>            | <input checked="" type="checkbox"/> For null hypothesis testing, the test statistic (e.g. $F$ , $t$ , $r$ ) with confidence intervals, effect sizes, degrees of freedom and $P$ value noted<br><i>Give <math>P</math> values as exact values whenever suitable.</i>                            |
| <input checked="" type="checkbox"/> | <input type="checkbox"/> For Bayesian analysis, information on the choice of priors and Markov chain Monte Carlo settings                                                                                                                                                                      |
| <input checked="" type="checkbox"/> | <input type="checkbox"/> For hierarchical and complex designs, identification of the appropriate level for tests and full reporting of outcomes                                                                                                                                                |
| <input checked="" type="checkbox"/> | <input type="checkbox"/> Estimates of effect sizes (e.g. Cohen's $d$ , Pearson's $r$ ), indicating how they were calculated                                                                                                                                                                    |

*Our web collection on [statistics for biologists](#) contains articles on many of the points above.*

### Software and code

Policy information about [availability of computer code](#)

|                 |                                                                                                                                                                                      |
|-----------------|--------------------------------------------------------------------------------------------------------------------------------------------------------------------------------------|
| Data collection | Schematic diagram of experimental designs were drawn with Adobe illustrator 2022. Other data were collected with GraphPad Prism software (9.0).                                      |
| Data analysis   | The following software was used for data analysis: GraphPad Prism (9.0), R software (V.3.0.1), ImageJ (v1.51), limma package (version 3.26.8), VennDiagram software (version 1.7.3). |

For manuscripts utilizing custom algorithms or software that are central to the research but not yet described in published literature, software must be made available to editors and reviewers. We strongly encourage code deposition in a community repository (e.g. GitHub). See the Nature Portfolio [guidelines for submitting code & software](#) for further information.

### Data

Policy information about [availability of data](#)

All manuscripts must include a [data availability statement](#). This statement should provide the following information, where applicable:

- Accession codes, unique identifiers, or web links for publicly available datasets
- A description of any restrictions on data availability
- For clinical datasets or third party data, please ensure that the statement adheres to our [policy](#)

Data supporting the findings of this manuscript are available from the corresponding authors upon reasonable request.  
Three microarray datasets (GSE171269, GSE31953, and GSE145052) were obtained from the Gene Expression Omnibus database.

Approximately 100 mg of liver tissue was collected and flash-frozen in liquid nitrogen for subsequent RNA-seq analysis. The RNA-seq analysis was performed by Novogene Bioinformatics Technology Co., Ltd (Beijing, China). The raw RNA-seq data generated in this study have been deposited in the Gene Expression Omnibus (GEO) database under the accession number GSE236979.

The mass spectrometry proteomics data have been deposited to the ProteomeXchange Consortium via the PRIDE partner repository with the dataset identifier PXD046104 and PXD046118.

## Research involving human participants, their data, or biological material

Policy information about studies with [human participants or human data](#). See also policy information about [sex, gender \(identity/presentation\), and sexual orientation](#) and [race, ethnicity and racism](#).

### Reporting on sex and gender

Male mice were used for the experiments in this study because the prevalence of diabetes is much higher in males than in females, and the experiments and results are usually analyzed in males. This study included 10 (5 males, 5 females) patients aged 40-60 years with pancreatic occupations from June 2022 to December 2022 at the China-Japan Friendship Hospital (Beijing, China). The results showed that male and female patients did not present significant differences in Nogo-B protein, and all diabetic patients had significantly increased intestinal Nogo-B level.

### Reporting on race, ethnicity, or other socially relevant groupings

The study didn't involve race, ethnicity, or other socially relevant groupings.

### Population characteristics

This study included 12 patients aged 40-60 years with pancreatic occupations from June 2022 to December 2022 at the China-Japan Friendship Hospital (Beijing, China). All patients underwent their first surgery without prior radiotherapy or chemotherapy.s.

### Recruitment

The 12 patients with pancreatic occupations were divided into two groups, one without T2DM and the other with T2DM. Patients with a history of other malignancies or other abnormal metabolic diseases (except T2DM) were excluded at the time of inclusion.

### Ethics oversight

Each patient provided signed informed consent, and the study was approved by the Ethics Committee of China-Japan Friendship Hospital (No 2018-72-K52).

Note that full information on the approval of the study protocol must also be provided in the manuscript.

## Field-specific reporting

Please select the one below that is the best fit for your research. If you are not sure, read the appropriate sections before making your selection.

Life sciences  Behavioural & social sciences  Ecological, evolutionary & environmental sciences

For a reference copy of the document with all sections, see [nature.com/documents/nr-reporting-summary-flat.pdf](https://www.nature.com/documents/nr-reporting-summary-flat.pdf)

## Life sciences study design

All studies must disclose on these points even when the disclosure is negative.

### Sample size

The sample size of our animal experiments was determined based on previous experiments and to minimize the use in accordance with animal care guidelines. Additional details regarding sample size can be found in the corresponding figure legends.

### Data exclusions

No data were excluded from the analyses.

### Replication

Each independent experiment was replicated at least 3 times.

### Randomization

For in vitro experiments, all mice were assigned to different groups according to a randomized block experimental design. For in vitro experiments, cells were randomly allocated into different groups.

### Blinding

The investigators were blinded to group allocation during data collection and analysis.

## Reporting for specific materials, systems and methods

We require information from authors about some types of materials, experimental systems and methods used in many studies. Here, indicate whether each material, system or method listed is relevant to your study. If you are not sure if a list item applies to your research, read the appropriate section before selecting a response.

## Materials &amp; experimental systems

| n/a                                 | Involved in the study                                           |
|-------------------------------------|-----------------------------------------------------------------|
| <input type="checkbox"/>            | <input checked="" type="checkbox"/> Antibodies                  |
| <input type="checkbox"/>            | <input checked="" type="checkbox"/> Eukaryotic cell lines       |
| <input checked="" type="checkbox"/> | <input type="checkbox"/> Palaeontology and archaeology          |
| <input type="checkbox"/>            | <input checked="" type="checkbox"/> Animals and other organisms |
| <input checked="" type="checkbox"/> | <input type="checkbox"/> Clinical data                          |
| <input checked="" type="checkbox"/> | <input type="checkbox"/> Dual use research of concern           |
| <input checked="" type="checkbox"/> | <input type="checkbox"/> Plants                                 |

## Methods

| n/a                                 | Involved in the study                           |
|-------------------------------------|-------------------------------------------------|
| <input checked="" type="checkbox"/> | <input type="checkbox"/> ChIP-seq               |
| <input checked="" type="checkbox"/> | <input type="checkbox"/> Flow cytometry         |
| <input checked="" type="checkbox"/> | <input type="checkbox"/> MRI-based neuroimaging |

## Antibodies

## Antibodies used

Anti-Flag (Cat# M20008), anti-GFP (Cat# M20004), anti-GLP1 (Cat# T56696), and anti-HA (Cat# M20003), anti-INSR (Cat# T55803), anti-IRS1 (Cat# T55830), anti-pIRS1 (Cat# TA3272), anti-IRS2 (Cat# PA5455), anti-pIRS2 (Cat# TA8383), anti-AKT (Cat# T55561), anti-pAKT (Cat# T40067), anti-PERK (Cat# TP52759), anti-pPERK (Cat# TA4499), anti-IRE1 (Cat# TA7651), anti-pIRE1 (Cat# T55605), anti-ATF4 (Cat# T55873), anti-XBP1 (Cat# T56725) antibodies were purchased from Abmart.

Anti-cleaved caspase3 (Cat# 9664) antibody was purchased from Cell Signaling Technology.

Anti-Nogo (Cat# IMG-5346A) antibody was purchased from Novus.

Anti-GAPDH (Cat# HRP-60004), anti-pINSR (Cat# 31133-1-AP), anti-GCG (Cat# 15954-1-AP), anti-GRP94 (Cat# 14700-1-AP), anti-HSP90 (Cat# 13171-1-AP), anti-Rabbit IgG (Cat# 30000-0-AP), fluorescein (FITC)-conjugated Affinipure Goat anti-Mouse IgG(H+L) (Cat# SA00003-1), fluorescein (FITC)-conjugated Affinipure Goat anti-Rabbit IgG(H+L) (Cat# SA00003-2), Rhodamine (TRITC)-conjugated Goat anti-Mouse IgG(H+L), (Cat# SA00007-1), and Rhodamine (TRITC)-conjugated Goat anti-Rabbit IgG(H+L) (Cat# SA00007-2) antibodies were purchased from Proteintech.

Anti-insulin (Cat# sc-377071) and anti-PCSK1 (Cat# sc-100578) antibodies were purchased from Santa Cruz Biotechnology.

## Validation

Antibody validations were performed by antibody supplier (see links below).

anti-Flag (Cat# M20008), <https://www.ab-mart.com.cn/page.aspx?node=%2059%20&id=%20968>

anti-GFP (Cat# M20004), <https://www.ab-mart.com.cn/page.aspx?node=%2059%20&id=%20971>

anti-GLP1 (Cat# T56696), <https://www.ab-mart.com.cn/page.aspx?node=%2077%20&id=%202364>

anti-HA (Cat# M20003), <https://www.ab-mart.com.cn/page.aspx?node=%2059%20&id=%20963>

anti-INSR (Cat# T55803), <https://www.ab-mart.com.cn/page.aspx?node=%2077%20&id=%202041>

anti-IRS1 (Cat# T55830), <https://www.ab-mart.com.cn/page.aspx?node=%2077%20&id=%202067>

anti-pIRS1 (Cat# TA3272), <https://www.ab-mart.com.cn/page.aspx?node=%2077%20&id=%2018193>

anti-IRS2 (Cat# PA5455), <https://www.ab-mart.com.cn/page.aspx?node=%2077%20&id=%2052742>

anti-pIRS2 (Cat# TA8383), <https://www.ab-mart.com.cn/page.aspx?node=%2077%20&id=%2022789>

anti-AKT (Cat# T55561), <https://www.ab-mart.com.cn/page.aspx?node=%2077%20&id=%201801>

anti-pAKT (Cat# T40067), <https://www.ab-mart.com.cn/page.aspx?node=%2077%20&id=%201224>

anti-PERK (Cat# TP52759), <https://www.ab-mart.com.cn/page.aspx?node=%2077%20&id=%2048763>

anti-pPERK (Cat# TA4499), <https://www.ab-mart.com.cn/page.aspx?node=%2077%20&id=%2019544>

anti-IRE1 (Cat# TA7651), <https://www.ab-mart.com.cn/page.aspx?node=%2077%20&id=%2019136>

anti-pIRE1 (Cat# T55605), <https://www.ab-mart.com.cn/page.aspx?node=%2077%20&id=%201845>

anti-ATF4 (Cat# T55873), <https://www.ab-mart.com.cn/page.aspx?node=%2077%20&id=%202110>

anti-XBP1 (Cat# T56725), <https://www.ab-mart.com.cn/page.aspx?node=%2077%20&id=%202393>

anti-cleaved caspase3 (Cat# 9664), [https://www.cellsignal.cn/products/primary-antibodies/cleaved-caspase-3-asp175-5a1e-rabbit-mab/9664?\\_requestid=577454](https://www.cellsignal.cn/products/primary-antibodies/cleaved-caspase-3-asp175-5a1e-rabbit-mab/9664?_requestid=577454)

anti-Nogo (Cat# IMG-5346A), [https://www.novusbio.com/products/nogo-antibody\\_nb100-56681](https://www.novusbio.com/products/nogo-antibody_nb100-56681)

anti-GAPDH (Cat# HRP-60004), <https://www.ptglab.com/products/GAPDH-Antibody-HRP-60004.htm>

anti-pINSR (Cat# 31133-1-AP), <https://www.ptgcn.com/products/Phospho-INSR-Tyr1150-1151-Antibody-31133-1-AP.htm>

anti-GCG (Cat# 15954-1-AP), <https://www.ptglab.com/products/GCG-Antibody-15954-1-AP.htm>

anti-GRP94 (Cat# 14700-1-AP), <https://www.ptglab.com/products/HSP90B1-Antibody-14700-1-AP.htm>

anti-HSP90 (Cat# 13171-1-AP), <https://www.ptglab.com/products/HSP90-Antibody-13171-1-AP.htm>

anti-Rabbit IgG (Cat# 30000-0-AP), <https://www.ptglab.com/products/IgG-control-Antibody-30000-0-AP.htm>

Fluorescein (FITC)-conjugated Affinipure Goat anti-Mouse IgG(H+L) (Cat# SA00003-1), <https://www.ptglab.com/products/Fluorescein-FITC-conjugated-Affinipure-Goat-Anti-Mouse-IgG-H-L-secondary-antibody.htm>

Fluorescein (FITC)-conjugated Affinipure Goat anti-Rabbit IgG(H+L) (Cat# SA00003-2), <https://www.ptglab.com/products/Fluorescein-FITC-conjugated-Affinipure-Goat-Anti-Rabbit-IgG-H-L-secondary-antibody.htm>

Rhodamine (TRITC)-conjugated Goat anti-Mouse IgG(H+L), (Cat# SA00007-1), <https://www.ptglab.com/products/Rhodamine-TRITC-conjugated-Goat-Anti-Mouse-IgG-H-L-secondary-antibody.htm>

Rhodamine (TRITC)-conjugated Goat anti-Rabbit IgG(H+L) (Cat# SA00007-2), <https://www.ptglab.com/products/Rhodamine-TRITC-conjugated-Goat-Anti-Rabbit-IgG-H-L-secondary-antibody.htm>

Anti-insulin (Cat# sc-377071), <https://www.scbt.com/p/insulin-b-antibody-c-12?requestFrom=search>

anti-PCSK1 (Cat# sc-100578), <https://www.scbt.com/p/pcsk1-antibody-j-18?requestFrom=search>

## Eukaryotic cell lines

Policy information about [cell lines and Sex and Gender in Research](#)

|                                                                      |                                                                                                    |
|----------------------------------------------------------------------|----------------------------------------------------------------------------------------------------|
| Cell line source(s)                                                  | HEK293T cells (Cat# CRL-3216, ATCC) and STC-1 cells (Cat# CRL-3254, ATCC)                          |
| Authentication                                                       | Cell lines were authenticated by genomic DNA profiling assays (STR) performed by Biofavor Biotech. |
| Mycoplasma contamination                                             | Cell lines were tested negative for mycoplasma contamination.                                      |
| Commonly misidentified lines<br>(See <a href="#">ICLAC</a> register) | None                                                                                               |

## Animals and other research organisms

Policy information about [studies involving animals](#); [ARRIVE guidelines](#) recommended for reporting animal research, and [Sex and Gender in Research](#)

|                         |                                                                                                                                                                                                                                                                     |
|-------------------------|---------------------------------------------------------------------------------------------------------------------------------------------------------------------------------------------------------------------------------------------------------------------|
| Laboratory animals      | The db/db mice, db/m mice, Nogo global deficient (Nogo <sup>-/-</sup> ) mice, and Nogo conditional knockout (Nogof/f) mice were obtained from GemPharmatech Co., Ltd. (Nanjing, China). The Villin-Cre (VillinCre) mice were acquired from Shanghai Model Organisms |
| Wild animals            | No wild animals were used in the study                                                                                                                                                                                                                              |
| Reporting on sex        | This study was performed on male mice. Because the incidence of diabetes is higher in males than in females, and hormonal changes in female mice can affect the results of the experiment.                                                                          |
| Field-collected samples | No field collected samples were used in the study.                                                                                                                                                                                                                  |
| Ethics oversight        | All animal procedures conformed to the guide for the Care and Use of Laboratory Animal published by the US National Institute of Health and was approved by the Brigham and Women's Hospital Standing Committee on Animals (protocol #2016N000442)                  |

Note that full information on the approval of the study protocol must also be provided in the manuscript.

## Plants

|                       |     |
|-----------------------|-----|
| Seed stocks           | N/A |
| Novel plant genotypes | N/A |
| Authentication        | N/A |
